# Supplementary material
Source: PubMed Central journal article supplement (PMC5528315)
Supplement: MOL2-5-336-s004.pdf [file MOL2-5-336-s004.pdf]

**Supplementary table A. Datasets included in the meta-analysis**

| Author                                                      | Cell lines                                                                    | Genotype                                                                                                                                                                                  | Treatment                                                         | Time points                                           | Array                              |
|-------------------------------------------------------------|-------------------------------------------------------------------------------|-------------------------------------------------------------------------------------------------------------------------------------------------------------------------------------------|-------------------------------------------------------------------|-------------------------------------------------------|------------------------------------|
| Hissong, JG;<br>GEO: GSE770<br>(Barrett, Troup et al. 2007) | LNCaP C4-2<br>Prostate<br>adenocarcinoma<br>cells                             | WT cells                                                                                                                                                                                  | IR- 10 Sv                                                         | 0, 1, 2, 4, 6, 8,<br>12, 16, 20 &<br>24h              | Affymetrix<br>U95Av2               |
| (Jen and Cheung<br>2003)                                    | Lymphoblastoid<br>cell lines                                                  | WT cells                                                                                                                                                                                  | IR -<br>3 or 10 Gy                                                | 0, 1, 2, 6, 12, &<br>24h                              | Affymetrix<br>U95A                 |
| (Rieger, Hong et al.<br>2004)                               | Lymphoblastoid<br>cell lines                                                  | * 14 patients with<br>severe IR toxicity<br>(RadS)<br>* 13 patients with no<br>sensitivity to IR<br>(RadC)<br>* 15 patients with<br>skin cancer (SkCa)<br>* 15 healthy controls<br>(NoCa) | * IR - 5 Gy<br>* UV -<br>10J/m <sup>2</sup><br>* Mock<br>controls | IR - 4h<br>UV- 24h                                    | Affymetrix<br>U95Av2               |
| (Stankovic,<br>Hubank et al.<br>2004)                       | Peripheral blood<br>mononuclear<br>cells (PBMCs)<br>isolated from<br>patients | 16 patients with<br>B-CLL:<br>* 6 <i>ATM</i> -mutant<br>* 5 <i>TP53</i> -mutant<br>* 5 <i>ATM/TP53</i> WT                                                                                 | IR - 5 Gy                                                         | 10h                                                   | Affymetrix<br>U95Av2               |
| Rashi-Elkeles<br>(Unpublished<br>results)                   | BJ1-hTert<br>(foreskin<br>fibroblasts)                                        | WT cells                                                                                                                                                                                  | NCS - 200<br>ng/ml                                                | * IR - 0, 2, 4, 6,<br>8 & 12h<br>* 8h mock<br>control | Affymetrix<br>HG-U133A2            |
| Rashi-Elkeles<br>GEO: GSE30240.<br>(current results)        | 5 different cell<br>lines                                                     | * WT cells: Bj1-<br>hTert, TK6<br>* Cancerous cell<br>lines: G361, HepG2<br>& U2OS                                                                                                        | IR - 5 Gy                                                         | * IR - 0, 3 & 6h<br>* 3 & 6h mock<br>controls         | Affymetrix<br>HG-U133A<br>plus 2.0 |

Barrett, T., D. B. Troup, et al. (2007). "NCBI GEO: mining tens of millions of expression profiles-- database and tools update." *Nucleic Acids Res* 35(Database issue): D760-765.

Jen, K. Y. and V. G. Cheung (2003). "Transcriptional response of lymphoblastoid cells to ionizing radiation." *Genome Res* 13(9): 2092-2100.

Rieger, K. E., W. J. Hong, et al. (2004). "Toxicity from radiation therapy associated with abnormal transcriptional responses to DNA damage." *Proc Natl Acad Sci U S A* 101(17): 6635-6640.

Stankovic, T., M. Hubank, et al. (2004). "Microarray analysis reveals that TP53- and ATM-mutant B-CLLs share a defect in activating proapoptotic responses after DNA damage but are distinguished by major differences in activating prosurvival responses." *Blood* 103(1): 291-300.
