# Supplementary material
Source: PubMed Central journal article supplement (PMC5528315)
Supplement: MOL2-5-336-s005.pdf [file MOL2-5-336-s005.pdf]

**Supplementary Table C. Genes differentially expressed in response to DNA damage, as identified by meta-analysis**

**Up-regulated Genes**

|    | <b>N*</b> | <b>Gene</b>   | <b>LocusLink ID</b> |
|----|-----------|---------------|---------------------|
| 1  | 16        | GDF15         | 9518                |
| 2  | 14        | CDKN1A        | 1026                |
| 3  | 13        | ATF3          | 467                 |
| 4  | 13        | FDXR          | 2232                |
| 5  | 13        | MDM2          | 4193                |
| 6  | 12        | GADD45A       | 1647                |
| 7  | 12        | PPM1D         | 8493                |
| 8  | 11        | DDB2          | 1643                |
| 9  | 11        | TOP3A         | 7156                |
| 10 | 10        | ACTA2         | 59                  |
| 11 | 10        | BBC3          | 27113               |
| 12 | 10        | TP53I3        | 9540                |
| 13 | 10        | XPC           | 7508                |
| 14 | 9         | ABCB6         | 10058               |
| 15 | 9         | BTG2          | 7832                |
| 16 | 9         | GLS2          | 27165               |
| 17 | 9         | NINJ1         | 4814                |
| 18 | 9         | PLK2          | 10769               |
| 19 | 9         | RRAD          | 6236                |
| 20 | 8         | BAX           | 581                 |
| 21 | 8         | GAMT          | 2593                |
| 22 | 8         | ITPKC         | 80271               |
| 23 | 8         | PLXNB2        | 23654               |
| 24 | 8         | RAD9A         | 5883                |
| 25 | 8         | TNFRSF10B     | 8795                |
| 26 | 7         | APLP1         | 333                 |
| 27 | 7         | C10orf10      | 11067               |
| 28 | 7         | DHRS3         | 9249                |
| 29 | 7         | EFNB1         | 1947                |
| 30 | 7         | MLL2          | 8085                |
| 31 | 7         | PGF           | 5228                |
| 32 | 7         | PLCB2         | 5330                |
| 33 | 7         | POU2F2        | 5452                |
| 34 | 7         | SCAND2        | 54581               |
| 35 | 7         | SELPLG        | 6404                |
| 36 | 7         | SNX13         | 23161               |
| 37 | 7         | TRIM22        | 10346               |
| 38 | 7         | TRO           | 7216                |
| 39 | 6         | APEG1         | 10290               |
| 40 | 6         | CBARA1        | 10367               |
| 41 | 6         | CTNNBIP1      | 56998               |
| 42 | 6         | DKFZP586A0522 | 25840               |
| 43 | 6         | DUSP9         | 1852                |

|    |   |          |       |
|----|---|----------|-------|
| 44 | 6 | ELL      | 8178  |
| 45 | 6 | FADS3    | 3995  |
| 46 | 6 | FHL2     | 2274  |
| 47 | 6 | FZR1     | 51343 |
| 48 | 6 | HBB      | 3043  |
| 49 | 6 | IGFBP4   | 3487  |
| 50 | 6 | NRGN     | 4900  |
| 51 | 6 | PCBP4    | 57060 |
| 52 | 6 | PCNA     | 5111  |
| 53 | 6 | PRKACA   | 5566  |
| 54 | 6 | PTP4A1   | 7803  |
| 55 | 6 | SLC6A8   | 6535  |
| 56 | 6 | TM7SF2   | 7108  |
| 57 | 6 | TNFAIP3  | 7128  |
| 58 | 6 | TOB1     | 10140 |
| 59 | 6 | TP53AP1  | 11257 |
| 60 | 6 | ZNF79    | 7633  |
| 61 | 5 | ACVR2B   | 93    |
| 62 | 5 | ANXA9    | 8416  |
| 63 | 5 | APOBEC3G | 60489 |
| 64 | 5 | ARL3     | 403   |
| 65 | 5 | ARSA     | 410   |
| 66 | 5 | ASCC3    | 10973 |
| 67 | 5 | ASPA     | 443   |
| 68 | 5 | ATP2B3   | 492   |
| 69 | 5 | BTNL3    | 10917 |
| 70 | 5 | CACNA1H  | 8912  |
| 71 | 5 | CES2     | 8824  |
| 72 | 5 | CYFIP2   | 26999 |
| 73 | 5 | DPEP1    | 1800  |
| 74 | 5 | F2R      | 2149  |
| 75 | 5 | FETUB    | 26998 |
| 76 | 5 | FEZ1     | 9638  |
| 77 | 5 | GPT      | 2875  |
| 78 | 5 | GRB10    | 2887  |
| 79 | 5 | GSTM1    | 2944  |
| 80 | 5 | HLF      | 3131  |
| 81 | 5 | HOXB7    | 3217  |
| 82 | 5 | HRAS     | 3265  |
| 83 | 5 | ICA1     | 3382  |
| 84 | 5 | INE1     | 8552  |
| 85 | 5 | ITGAE    | 3682  |
| 86 | 5 | KRT17    | 3872  |
| 87 | 5 | LIF      | 3976  |
| 88 | 5 | LMNA     | 4000  |
| 89 | 5 | MAPK13   | 5603  |
| 90 | 5 | MAST2    | 23139 |
| 91 | 5 | MT1F     | 4494  |

|     |   |           |        |
|-----|---|-----------|--------|
| 92  | 5 | NFKB2     | 4791   |
| 93  | 5 | OSBPL3    | 26031  |
| 94  | 5 | P4HA2     | 8974   |
| 95  | 5 | PDE4C     | 5143   |
| 96  | 5 | PEX13     | 5194   |
| 97  | 5 | PLK3      | 1263   |
| 98  | 5 | PML       | 5371   |
| 99  | 5 | POMZP3    | 22932  |
| 100 | 5 | PPIE      | 10450  |
| 101 | 5 | PRF1      | 5551   |
| 102 | 5 | PRODH     | 5625   |
| 103 | 5 | PYY       | 5697   |
| 104 | 5 | RAPGEF1   | 2889   |
| 105 | 5 | RNF144    | 9781   |
| 106 | 5 | SGK       | 6446   |
| 107 | 5 | SHC3      | 53358  |
| 108 | 5 | SRISNF2L  | 23132  |
| 109 | 5 | TH        | 7054   |
| 110 | 5 | TKTL1     | 8277   |
| 111 | 5 | TNFRSF25  | 8718   |
| 112 | 5 | TNFSF9    | 8744   |
| 113 | 5 | TPM3      | 7170   |
| 114 | 5 | ZNF629    | 23361  |
| 115 | 4 | AAK1      | 22848  |
| 116 | 4 | ACTB      | 60     |
| 117 | 4 | ADAMDEC1  | 27299  |
| 118 | 4 | ADPRH     | 141    |
| 119 | 4 | AKT2      | 208    |
| 120 | 4 | APBA3     | 9546   |
| 121 | 4 | APOBEC3C  | 27350  |
| 122 | 4 | ARNTL     | 406    |
| 123 | 4 | ATP10A    | 57194  |
| 124 | 4 | ATP8B3    | 148229 |
| 125 | 4 | C20orf111 | 51526  |
| 126 | 4 | C9orf127  | 51754  |
| 127 | 4 | CA12      | 771    |
| 128 | 4 | CAMK2G    | 818    |
| 129 | 4 | CCNG1     | 900    |
| 130 | 4 | CD151     | 977    |
| 131 | 4 | CDC42EP4  | 23580  |
| 132 | 4 | CLCN2     | 1181   |
| 133 | 4 | COL1A1    | 1277   |
| 134 | 4 | COL9A2    | 1298   |
| 135 | 4 | CPM       | 1368   |
| 136 | 4 | CSNK1G2   | 1455   |
| 137 | 4 | CSPG2     | 1462   |
| 138 | 4 | DDIT3     | 1649   |
| 139 | 4 | DDR1      | 780    |

|     |   |           |       |
|-----|---|-----------|-------|
| 140 | 4 | DOC2B     | 8447  |
| 141 | 4 | DUSP14    | 11072 |
| 142 | 4 | FCN2      | 2220  |
| 143 | 4 | FOXD2     | 2306  |
| 144 | 4 | FOXG1B    | 2290  |
| 145 | 4 | FST       | 10468 |
| 146 | 4 | FUCA1     | 2517  |
| 147 | 4 | GCH1      | 2643  |
| 148 | 4 | GFRA3     | 2676  |
| 149 | 4 | GPR18     | 2841  |
| 150 | 4 | GREB1     | 9687  |
| 151 | 4 | HARS      | 3035  |
| 152 | 4 | HBD       | 3045  |
| 153 | 4 | HIST1H2BD | 3017  |
| 154 | 4 | HSPB1     | 3315  |
| 155 | 4 | HUS1      | 3364  |
| 156 | 4 | IL10RA    | 3587  |
| 157 | 4 | IL1B      | 3553  |
| 158 | 4 | INHA      | 3623  |
| 159 | 4 | INPP1     | 3628  |
| 160 | 4 | INPP5F    | 22876 |
| 161 | 4 | JMJD2B    | 23030 |
| 162 | 4 | KCNJ2     | 3759  |
| 163 | 4 | KIAA0543  | 23145 |
| 164 | 4 | KLK2      | 3817  |
| 165 | 4 | MAD1L1    | 8379  |
| 166 | 4 | MAP1A     | 4130  |
| 167 | 4 | MAP2K7    | 5609  |
| 168 | 4 | MGC10471  | 81576 |
| 169 | 4 | MTMR2     | 8898  |
| 170 | 4 | NALP1     | 22861 |
| 171 | 4 | NFKBIA    | 4792  |
| 172 | 4 | NRG1      | 3084  |
| 173 | 4 | PITX3     | 5309  |
| 174 | 4 | PKD1      | 5310  |
| 175 | 4 | PLXNB1    | 5364  |
| 176 | 4 | PPY       | 5539  |
| 177 | 4 | PRKAB1    | 5564  |
| 178 | 4 | PRKY      | 5616  |
| 179 | 4 | PSG3      | 5671  |
| 180 | 4 | PSG4      | 5672  |
| 181 | 4 | PTPN6     | 5777  |
| 182 | 4 | PTPRN     | 5798  |
| 183 | 4 | PTPRO     | 5800  |
| 184 | 4 | REV3L     | 5980  |
| 185 | 4 | SCRIB     | 23513 |
| 186 | 4 | SERPINB7  | 8710  |
| 187 | 4 | SERPINB9  | 5272  |

|                             |   |           |       |
|-----------------------------|---|-----------|-------|
| 188                         | 4 | SLC13A2   | 9058  |
| 189                         | 4 | SLN       | 6588  |
| 190                         | 4 | SMAD5     | 4090  |
| 191                         | 4 | SPINK4    | 27290 |
| 192                         | 4 | SYNGR3    | 9143  |
| 193                         | 4 | TAP1      | 6890  |
| 194                         | 4 | TCF3      | 6929  |
| 195                         | 4 | TNFRSF10C | 8794  |
| 196                         | 4 | TNFSF4    | 7292  |
| 197                         | 4 | TNFSF7    | 970   |
| 198                         | 4 | TRPM2     | 7226  |
| 199                         | 4 | VAV2      | 7410  |
| <b>Down-regulated Genes</b> |   |           |       |
| 1                           | 8 | CCNB1     | 891   |
| 2                           | 8 | PLK1      | 5347  |
| 3                           | 7 | CENPA     | 1058  |
| 4                           | 7 | NEK2      | 4751  |
| 5                           | 7 | TROAP     | 10024 |
| 6                           | 6 | BUB1      | 699   |
| 7                           | 6 | CCNF      | 899   |
| 8                           | 6 | CDC20     | 991   |
| 9                           | 6 | KIF14     | 9928  |
| 10                          | 6 | MYC       | 4609  |
| 11                          | 6 | PPARD     | 5467  |
| 12                          | 6 | STK6      | 6790  |
| 13                          | 5 | ACP5      | 54    |
| 14                          | 5 | CENPE     | 1062  |
| 15                          | 5 | CYP11B2   | 1585  |
| 16                          | 5 | EIF4A1    | 1973  |
| 17                          | 5 | KIF23     | 9493  |
| 18                          | 5 | LTBP1     | 4052  |
| 19                          | 5 | MXD4      | 10608 |
| 20                          | 4 | BCL11A    | 53335 |
| 21                          | 4 | C18orf1   | 753   |
| 22                          | 4 | CCIN      | 881   |
| 23                          | 4 | CCNA2     | 890   |
| 24                          | 4 | CCNB2     | 9133  |
| 25                          | 4 | CENPF     | 1063  |
| 26                          | 4 | CKS2      | 1164  |
| 27                          | 4 | DLEC1     | 9940  |
| 28                          | 4 | DLG7      | 9787  |
| 29                          | 4 | EIF3S9    | 8662  |
| 30                          | 4 | FBP1      | 2203  |
| 31                          | 4 | FGFR3     | 2261  |
| 32                          | 4 | GRIN1     | 2902  |
| 33                          | 4 | GTSE1     | 51512 |
| 34                          | 4 | GUCY1A2   | 2977  |
| 35                          | 4 | HIRA      | 7290  |

|                                                                                                       |   |          |       |
|-------------------------------------------------------------------------------------------------------|---|----------|-------|
| 36                                                                                                    | 4 | ITIH1    | 3697  |
| 37                                                                                                    | 4 | KCNAB2   | 8514  |
| 38                                                                                                    | 4 | KIF2C    | 11004 |
| 39                                                                                                    | 4 | KIFC1    | 3833  |
| 40                                                                                                    | 4 | KIFC3    | 3801  |
| 41                                                                                                    | 4 | KNTC2    | 10403 |
| 42                                                                                                    | 4 | LOC92558 | 92558 |
| 43                                                                                                    | 4 | MYOG     | 4656  |
| 44                                                                                                    | 4 | MYR8     | 23026 |
| 45                                                                                                    | 4 | PDCD1    | 5133  |
| 46                                                                                                    | 4 | SMG1     | 23049 |
| 47                                                                                                    | 4 | TAP2     | 6891  |
| 48                                                                                                    | 4 | TJP3     | 27134 |
| 49                                                                                                    | 4 | ZNF264   | 9422  |
| * "N" is the number of conditions (out of 21) in which gene was significantly changed upon DNA damage |   |          |       |
