# Supplementary material
Source: PubMed Central journal article supplement (PMC5528315)
Supplement: MOL2-5-336-s006.pdf [file MOL2-5-336-s006.pdf]

**Uwr rigo gpwt { 'Table D. Primers used for ChIP assay and quantitative real-time-RT-PCR**

| <b>Gene</b> | <b>ChIP assay<br/>(Primer sequence, 5' → 3')</b>   | <b>Quantitative real-time-RT-PCR<br/>(Primer sequence, 5' → 3')</b> |
|-------------|----------------------------------------------------|---------------------------------------------------------------------|
| BCL2L1      | _____                                              | F: TGAGTCGGATCGCAGCTTG<br>R: CTCTCGGCTGCTGCATTGT                    |
| CD164       | _____                                              | F: TTTCCACGGCCACTCCAG<br>R: GAACTGTGGGTTTAGCTGTAGAATTG              |
| EGR2        | F: CTGCACAAACGACCATGAAT<br>R: CCTTCTGTTTCGTTCCCAA  | F: CCGGAGATGGCATGATCAAC<br>R: TCCAACGACCTCTTCTCTCCAG                |
| FUCA1       | F: GGGTTGGGACTTCTCAAAT<br>R: TGTGGACAGCAAACCACAT   | F: GCTATCGTCGTGACATGGCAT<br>R: GTTCAGAAGATAGTTGCCTCCCA              |
| GCH1        | F: TCCAGGAAGTTTCCGGAGTT<br>R: GAGTTCCGGGGCTGAGAG   | F: GTAGCAATCACGGAAGCCTTG<br>R: TGTGTGTTGCTTCAACCACTACC              |
| HRAS        | F: TAGTACGCAGTAGGCGCTCA<br>R: GTCGGCAGAAAGGCTAAAGG | F: TGCCATCAACAACACCAAGTC<br>R: CCGTTTGATCTGCTCCCTGT                 |
| LMNA        | F: CCCCTCCCCTAATAACCAAA<br>R: TTATCCTCCGATGAGCAACC | F: GCGTACGGCTCTCATCAACTC<br>R: TCGTCCTCAACCACAGTCACTG               |
| NINJ1       | F: ACCGAGGAGTACGAGCTCAA<br>R: GGAAGGACTTGGCCTAGAG  | F: CCCAGCTTCGCCTTCTATGT<br>R: CGGGTTGTTAAGGTCGTACTIONGAC            |
| PGF         | F: CTAGCCTCCCATCCTTTTCC<br>R: GGTACCTTGGAGCTCTGCAC | F: TCCTACGTGGAGCTGACGTTC<br>R: CCTCCTTTCCGGCTTCATC                  |
| PTP4A1      | F: CTTGGCCCTTTGGTCTGG<br>R: GTATCCGGCTCCGCAGTG     | F: AGGTATCCATGTTCTTGATTGGC<br>R: AACAACCAGGTTCTTCACGAAACT           |
| SCRIB       | F: ACTGGCCTCTGCTACTGCAT<br>R: CCCAAAGAATGTGACCCTGT | F: AGGCAACGATCTGGAAGTGC<br>R: CCGGTCAAGCCACAGCTC                    |
| TNFSF9      | F: CCAGAGCAGATGGGAAATGT<br>R: GGAACCCTGAGTGTCATGCT | F: AAATGTTCTGCTGATCGATGGG<br>R: CCTTCGTGTCCTCTTTGTAGCTC             |

|                                                                                                                                |                                                    |                                                          |
|--------------------------------------------------------------------------------------------------------------------------------|----------------------------------------------------|----------------------------------------------------------|
| ZNF79                                                                                                                          | F: CAAAGAGTGGCTGTGACTCG<br>R: TCTCTGGGCGTAAGGGTCTA | F: CCAGGAAAGTCCAGGAGCCT<br>R: GTTCCAACCTGGGAGTTCATGC     |
| CDKN1A                                                                                                                         | F: AGGTCAGCTGCGTTAGAGGA<br>R: TCTGTGCCTGAAACATTTGC | F: GCAGACCAGCATGACAGATTTC<br>R: GCGCTTCCAGGACTGCAG       |
| GDF15                                                                                                                          | _____                                              | F: AGAGTTGCGGAAACGCTACG<br>R: GCACTTCTGGCGTGAGTATCC      |
| BTG2                                                                                                                           | _____                                              | F: GGCAGAACATTATAAACATCACTGGT<br>R: GGTAACCCGATCCCTTGCAT |
| TBP                                                                                                                            | _____                                              | F: CGCCAGCTTCGGAGAGTTC<br>R: ACAACCAAGATTCACTGTGGATACA   |
| GAPDH                                                                                                                          | F: TTTCATGCAGCAGAGAGAGG<br>R: ATTCTCCCCAGAGAGGCTGT | _____                                                    |
| <ul style="list-style-type: none"> <li>• Human genes</li> <li>• F and R stand for forward and reverse, respectively</li> </ul> |                                                    |                                                          |
